# Supplementary material for: Assessment of the effects of organic vs. inorganic arsenic and mercury in Caenorhabditis elegans
Source: PubMed Central journal article supplement — Curr Res Toxicol. 2022 May 8;3:100071. doi: 10.1016/j.crtox.2022.100071 (PMC9118485; doi:10.1016/j.crtox.2022.100071), 2022-05-08
Supplement: mmc1.pdf [file mmc1.pdf]

## Supplement 2: DAVID and IPA Analyses

p1. DAVID annotation

p2. NaAsO<sub>2</sub> IPA

p12. DMA IPA

p23. HgCl<sub>2</sub> IPA

p33: meHgCl IPA

### DAVID: Functional Annotation Tool

#### NaAsO<sub>2</sub>

| Category         | Term                                                                              | Count | PValue   |
|------------------|-----------------------------------------------------------------------------------|-------|----------|
| GOTERM_BP_DIRECT | GO:0007186~G-protein coupled receptor signaling pathway                           | 8     | 0.004895 |
| GOTERM_BP_DIRECT | GO:0050911~detection of chemical stimulus involved in sensory perception of smell | 4     | 0.049165 |
| GOTERM_BP_DIRECT | GO:0042048~olfactory behavior                                                     | 4     | 0.05787  |
| GOTERM_CC_DIRECT | GO:0016021~integral component of membrane                                         | 30    | 0.00941  |
| GOTERM_MF_DIRECT | GO:0008528~G-protein coupled peptide receptor activity                            | 4     | 0.013267 |

#### DMA

| Category         | Term                                      | Count | PValue   |
|------------------|-------------------------------------------|-------|----------|
| GOTERM_BP_DIRECT | GO:0034220~ion transmembrane transport    | 4     | 0.026982 |
| GOTERM_CC_DIRECT | GO:0016021~integral component of membrane | 42    | 0.001567 |
| GOTERM_MF_DIRECT | GO:0030246~carbohydrate binding           | 7     | 0.001481 |

#### HgCl<sub>2</sub>

| Category         | Term                | Count | PValue   |
|------------------|---------------------|-------|----------|
| GOTERM_CC_DIRECT | GO:0016020~membrane | 28    | 0.013239 |

#### meHgCl

| Category         | Term                                             | Count | PValue   |
|------------------|--------------------------------------------------|-------|----------|
| GOTERM_CC_DIRECT | GO:0016021~integral component of membrane        | 25    | 0.028521 |
| GOTERM_CC_DIRECT | GO:0016020~membrane                              | 25    | 0.034433 |
| GOTERM_CC_DIRECT | GO:0005887~integral component of plasma membrane | 7     | 0.010891 |
| GOTERM_MF_DIRECT | GO:0030246~carbohydrate binding                  | 7     | 4.65E-05 |

# INGENUITY<sup>®</sup>

## PATHWAY ANALYSIS

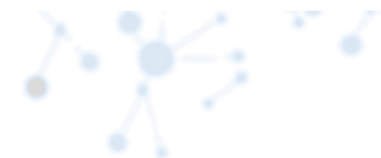

Analysis Name: NaASO2xWater\_p0.05\_FC1.5\_CLEAN - 2020-12-23 03:37 PM

Analysis Creation Date: 2020-12-23

Build version: exported

Content version: 60467501 (Release Date: 2020-11-19)

### Experiment Metadata

| Name                | Value                         |
|---------------------|-------------------------------|
| originalColumnNames | GENEBANKACC,GEN_ID_MFR,REFSEQ |

### Analysis Settings

Reference set: C. elegans (V2)

Relationship to include: Direct and Indirect

Includes Endogenous Chemicals

Optional Analyses: My Pathways My List

Filter Summary:

Consider only molecules and/or relationships where

(species = Mouse OR Rat OR Human OR Uncategorized) AND

(confidence = Experimentally Observed) AND

(tissues/cell lines = Monocyte-derived macrophage OR Other Monocytes OR Other Breast Cancer Cell Lines OR SF-295 OR Mast cells OR

Other Granulocytes OR HS 578T OR Lung Cancer Cell Lines not otherwise specified OR Lymphoma Cell Lines not otherwise specified OR

Other NK cells OR Adipocytes OR Other Ovarian Cancer Cell Lines OR B lymphocytes not otherwise specified OR Pro-B lymphocytes OR 3T3-

L1 cells OR Adipose OR Kidney Cancer Cell Lines not otherwise specified OR Dorsal Root Ganglion OR OVCAR-3 OR Immature monocyte-derived dendritic cells OR Min6 OR Pheochromocytoma cell lines not otherwise specified OR Epithelial cells not otherwise specified OR Macrophages not otherwise specified OR Th17 cells OR Peripheral blood leukocytes not otherwise specified OR Bladder OR Other CNS Cell Lines OR OVCAR-5 OR Brain OR Heart OR Gray Matter OR Organ Systems not otherwise specified OR Smooth Muscle OR MDA-N OR RKO OR Hepatocytes OR Other Macrophages OR RAW 264.7 OR Adrenal Gland OR Hippocampus OR Microglia OR Cos-7 cells OR Granule Cell Layer OR Mammary Gland OR Spinal Cord OR SF-268 OR Ventricular Zone OR Naive B cells OR HCT-116 OR Activated Vd2 Gamma-delta T cells OR Th1 cells OR Parietal Lobe OR J774 OR OVCAR-4 OR U251 OR Thymus OR Other Mononuclear leukocytes OR HepG2 OR OVCAR-8 OR Caudate Nucleus OR HuH7 OR Lens OR Melanocytes OR NCI-H332M OR U2OS OR HOP-62 OR Jurkat OR Bone marrow-derived macrophages OR MDA-MB-361 OR Bone marrow-derived dendritic cells OR Sciatic Nerve OR Other Immune cells OR HT29 OR Other Colon Cancer Cell Lines OR Naive helper T cells OR Small Intestine OR NCI-H226 OR Astrocytes OR Blood platelets OR WEHI-231 OR Other Peripheral blood leukocytes OR Brainstem OR Kidney cell lines not otherwise specified OR Choroid Plexus OR Medulla Oblongata OR NB4 OR THP-1 OR Oocytes OR INS-1 OR K-562 OR Other Endothelial cells OR CAKI-1 OR RBL-2H3 OR Other Memory T lymphocytes OR T lymphocytes not otherwise specified OR H460 OR A375 OR Monocyte-derived dendritic cells not otherwise specified OR A549-ATCC OR PC-3 OR MALME-3M OR Beta islet cells OR HeLa OR HL-60 OR HOP-92 OR Memory B cells OR CD56bright NK cells OR SR OR Other Myeloma Cell Lines OR Cytotoxic T cells OR Cervical cancer cell line not otherwise specified OR SN12C OR Effector memory RA+ cytotoxic T cells OR BT-549 OR Purkinje cells OR Prostate Cancer Cell Lines not otherwise specified OR Other Macrophage Cancer Cell Lines OR Langerhans cells OR Osteosarcoma Cell Lines not otherwise specified OR T47-D OR Cerebellum OR Microvascular endothelial cells OR Other Cell Line OR Lymphocytes not otherwise specified OR HMC-1 OR Other Fibroblast cell lines OR PANC-1 OR Calvaria OR SW-480 OR Neutrophils OR Other Lymphocytes OR Other Lymphoma Cell Lines OR LNCaP cells OR SK-MEL-28 OR Swiss 3T3 cells OR CD4+ T-lymphocytes OR Crypt OR Other Lung Cancer Cell Lines OR J-774A.1 OR KM-12 OR Megakaryocytes OR Skin OR Kidney OR Other Melanoma Cell Lines OR Natural T-regulatory cells OR Bone marrow cells not otherwise specified OR Cartilage Tissue OR IGROV1 OR SW-620 OR Monocytes not otherwise specified OR Other Leukemia Cell Lines OR Other Teratocarcinoma Cell Lines OR Vd1 Gamma-delta T cells OR Prostate Gland OR Cortical neurons OR Other Smooth muscle cells OR UO-31 OR Trachea OR Olfactory Bulb OR Testis OR Ovarian Cancer Cell Lines not otherwise specified OR SF-539 OR Activated helper T cells OR Activated Vd1 Gamma-delta T cells OR Other Osteosarcoma Cell Lines OR Teratocarcinoma Cell Lines not otherwise specified OR Endothelial cells not otherwise specified OR U266 OR Amygdala OR Effector memory cytotoxic T cells OR Other Neurons OR Esophagus OR Peritoneal macrophages OR Salivary Gland OR SNB-75 OR CD56dim NK cells OR Keratinocytes OR Subventricular Zone OR Mesenchymal stem cells OR Cells not otherwise specified OR A498 OR ACHN OR Other Cervical cancer cell line OR Ovary OR Dendritic cells not otherwise specified OR Stomach OR HEL OR Thalamus OR Activated CD56bright NK cells OR HCC-2998 OR Other Tissues and Primary Cells OR Other Nervous System OR Pancreatic Cancer Cell Lines not otherwise specified OR Spleen

OR Other Kidney cell lines OR NCI-H522 OR Striatum OR NCI-ADR-RES OR Cardiomyocytes OR Peripheral blood monocytes OR U87MG OR Activated CD56dim NK cells OR MDA-MB-231 OR Mature monocyte-derived dendritic cells OR Leukemia Cell Lines not otherwise specified OR Th2 cells OR Intraepithelial T lymphocytes OR Fibroblast cell lines not otherwise specified OR Chondrocytes OR CNS Cell Lines not otherwise specified OR Mononuclear leukocytes not otherwise specified OR CD34+ cells OR Effector T cells OR Pancreas OR Forestomach OR Other Hepatoma Cell Lines OR Other Kidney Cancer Cell Lines OR Uterus OR NIH/3T3 cells OR Central memory cytotoxic T cells OR Plasma cells OR MDA-MB-435 OR Other Neuroblastoma Cell Lines OR Hematopoietic progenitor cells OR Other Dendritic cells OR Neurons not otherwise specified OR Smooth muscle cells not otherwise specified OR Neuroblastoma Cell Lines not otherwise specified OR Fibroblasts OR Other Cells OR UACC-62 OR Placenta OR White Matter OR Other Pheochromocytoma cell lines OR Cerebral Cortex OR Pituitary Gland OR NT2/D1 OR Other Organ Systems OR Cerebral Ventricles OR Peripheral blood lymphocytes OR DU-145 OR Corpus Callosum OR Large Intestine OR PC-12 cells OR CCRF-CEM OR Vascular smooth muscle cells OR Hepatoma Cell Lines not otherwise specified OR Tissues and Primary Cells not otherwise specified OR BA/F3 OR BDCA-3+ dendritic cells OR M14 OR Other Bone marrow cells OR Granule cells OR COLO205 OR A2780 OR Nucleus Accumbens OR Thymocytes OR Other Monocyte-derived dendritic cells OR Granulocytes not otherwise specified OR Osteoblasts OR NK cells not otherwise specified OR Granulosa cells OR Pyramidal neurons OR LOX IMVI OR MCF7 OR EKVX OR MOLT-4 OR Colon Cancer Cell Lines not otherwise specified OR Melanoma Cell Lines not otherwise specified OR Stem cells not otherwise specified OR Epidermis OR Skeletal Muscle OR U937 OR Immune cell lines not otherwise specified OR Trigeminal Ganglion OR SK-MEL-2 OR UACC-257 OR Cornea OR Other Stem cells OR Dermis OR Splenocytes OR Thyroid Gland OR Liver OR Breast Cancer Cell Lines not otherwise specified OR Substantia Nigra OR Macrophage Cancer Cell Lines not otherwise specified OR MDA-MB-468 OR Eosinophils OR Other T lymphocytes OR Myeloma Cell Lines not otherwise specified OR Nervous System not otherwise specified OR Hep3B OR Other Immune cell lines OR SK-OV-3 OR Myeloid dendritic cells OR PBMCs OR Other B lymphocytes OR 293 cells OR Other Epithelial cells OR Memory T lymphocytes not otherwise specified OR Murine NKT cells OR Vd2 Gamma-delta T cells OR Cell Line not otherwise specified OR Hypothalamus OR Plasmacytoid dendritic cells OR MEF cells OR NCI-H23 OR SK-MEL-5 OR Retina OR Pre-B lymphocytes OR Caco2 cells OR Immune cells not otherwise specified OR Stromal cells OR 786-0 OR HUVEC cells OR Lung OR Embryonic stem cells OR P19 OR Putamen OR Lymph node OR TK-10 OR RPMI-8266 OR BT-474 OR Other Pancreatic Cancer Cell Lines OR Other Prostate Cancer Cell Lines OR MG-63 OR Central memory helper T cells OR HCT-15 OR Effector memory helper T cells OR Sertoli cells OR SK-N-SH OR BDCA-1+ dendritic cells OR RXF-393) AND (mol. types = biologic drug OR canonical pathway OR chemical - endogenous mammalian OR chemical - endogenous non-mammalian OR chemical - kinase inhibitor OR chemical - other OR chemical - protease inhibitor OR chemical drug OR chemical reagent OR chemical toxicant OR complex OR cytokine OR disease OR enzyme OR function OR fusion gene/product OR G-protein coupled receptor OR group OR growth factor OR ion channel OR kinase OR ligand-dependent nuclear receptor OR mature microRNA OR microRNA OR other OR peptidase OR phosphatase OR transcription regulator OR translation regulator OR transmembrane receptor OR transporter) AND

(data sources = An Open Access Database of Genome-wide Association Results OR BIND OR BioGRID OR Catalogue Of Somatic Mutations In Cancer (COSMIC) OR Chemical Carcinogenesis Research Information System (CCRIS) OR ClinicalTrials.gov OR ClinVar OR Cogna OR DIP OR DrugBank OR Gene Ontology (GO) OR GVK Biosciences OR Hazardous Substances Data Bank (HSDB) OR HumanCyc OR Ingenuity Expert Findings OR Ingenuity ExpertAssist Findings OR IntAct OR Interactome studies OR MIPS OR miRBase OR miRecords OR Mouse Genome Database (MGD) OR Obesity Gene Map Database OR Online Mendelian Inheritance in Man (OMIM) OR TarBase OR TargetScan Human)

## Top Canonical Pathways

| Name                                                           | p-value  | Overlap     |
|----------------------------------------------------------------|----------|-------------|
| <b>PXR/RXR Activation</b>                                      | 3.48E-04 | 30.0 % 3/10 |
| <b>Glutathione-mediated Detoxification</b>                     | 1.29E-03 | 50.0 % 2/4  |
| <b>Melatonin Signaling</b>                                     | 3.94E-03 | 13.6 % 3/22 |
| <b>GPCR-Mediated Nutrient Sensing in Enteroendocrine Cells</b> | 3.94E-03 | 13.6 % 3/22 |
| <b>Neuroprotective Role of THOP1 in Alzheimer's Disease</b>    | 9.10E-03 | 20.0 % 2/10 |

## Top Upstream Regulators

### Upstream Regulators

| Name        | p-value  | Predicted Activation |
|-------------|----------|----------------------|
| <b>MAFG</b> | 6.08E-05 |                      |
| <b>MAFK</b> | 6.08E-05 |                      |

|               |          |
|---------------|----------|
| <b>STIM1</b>  | 2.19E-04 |
| <b>REST</b>   | 8.07E-04 |
| <b>EIF2S1</b> | 2.13E-03 |

### Causal Network

| Name         | p-value  | Predicted Activation |
|--------------|----------|----------------------|
| <b>MAFG</b>  | 3.07E-05 |                      |
| <b>MAFK</b>  | 6.08E-05 |                      |
| <b>STIM1</b> | 2.19E-04 |                      |
| <b>TFIIH</b> | 3.17E-04 |                      |
| <b>IL1B</b>  | 8.00E-04 |                      |

### Top Diseases and Bio Functions

#### Diseases and Disorders

| Name                                       | p-value range       | # Molecules |
|--------------------------------------------|---------------------|-------------|
| <b>Neurological Disease</b>                | 4.42E-02 - 6.49E-04 | 39          |
| <b>Organismal Injury and Abnormalities</b> | 4.55E-02 - 6.49E-04 | 47          |
| <b>Psychological Disorders</b>             | 4.42E-02 - 1.01E-03 | 10          |
| <b>Hereditary Disorder</b>                 | 4.42E-02 - 1.25E-03 | 19          |
| <b>Gastrointestinal Disease</b>            | 4.50E-02 - 1.29E-03 | 42          |

**Molecular and Cellular Functions**

| Name                                  | p-value range       | # Molecules |
|---------------------------------------|---------------------|-------------|
| <b>Carbohydrate Metabolism</b>        | 4.42E-02 - 1.29E-03 | 10          |
| <b>Small Molecule Biochemistry</b>    | 4.42E-02 - 1.29E-03 | 17          |
| <b>Vitamin and Mineral Metabolism</b> | 4.42E-02 - 1.29E-03 | 7           |
| <b>Molecular Transport</b>            | 4.42E-02 - 2.12E-03 | 10          |
| <b>Protein Synthesis</b>              | 4.42E-02 - 2.12E-03 | 4           |

**Physiological System Development and Function**

| Name                                                 | p-value range       | # Molecules |
|------------------------------------------------------|---------------------|-------------|
| <b>Endocrine System Development and Function</b>     | 4.42E-02 - 2.12E-03 | 2           |
| <b>Connective Tissue Development and Function</b>    | 4.42E-02 - 3.15E-03 | 4           |
| <b>Hematological System Development and Function</b> | 4.69E-02 - 3.15E-03 | 9           |
| <b>Lymphoid Tissue Structure and Development</b>     | 4.69E-02 - 3.15E-03 | 4           |
| <b>Nervous System Development and Function</b>       | 4.42E-02 - 3.15E-03 | 11          |

**Top Tox Functions****Assays: Clinical Chemistry and Hematology**

| Name                                 | p-value range       | # Molecules |
|--------------------------------------|---------------------|-------------|
| <b>Increased Levels of Potassium</b> | 1.00E-01 - 1.00E-01 | 1           |

**Cardiotoxicity**

| Name                            | p-value range       | # Molecules |
|---------------------------------|---------------------|-------------|
| <b>Cardiac Stenosis</b>         | 5.77E-03 - 5.77E-03 | 2           |
| <b>Cardiac Dysfunction</b>      | 1.27E-01 - 4.42E-02 | 1           |
| <b>Congenital Heart Anomaly</b> | 3.31E-01 - 4.42E-02 | 2           |
| <b>Cardiac Enlargement</b>      | 1.50E-01 - 5.27E-02 | 3           |
| <b>Cardiac Infarction</b>       | 5.84E-02 - 5.84E-02 | 1           |

**Hepatotoxicity**

| Name                                        | p-value range       | # Molecules |
|---------------------------------------------|---------------------|-------------|
| <b>Liver Cholestasis</b>                    | 5.65E-02 - 1.49E-02 | 2           |
| <b>Liver Hyperbilirubinemia</b>             | 1.49E-02 - 1.49E-02 | 1           |
| <b>Glutathione Depletion In Liver</b>       | 4.42E-02 - 4.42E-02 | 1           |
| <b>Liver Hyperplasia/Hyperproliferation</b> | 2.11E-01 - 6.03E-02 | 26          |
| <b>Liver Damage</b>                         | 2.14E-01 - 1.00E-01 | 2           |

**Nephrotoxicity**

| Name                  | p-value range       | # Molecules |
|-----------------------|---------------------|-------------|
| <b>Nephrosis</b>      | 5.84E-02 - 1.10E-02 | 2           |
| <b>Kidney Failure</b> | 2.03E-01 - 5.84E-02 | 2           |



|                           |                     |   |
|---------------------------|---------------------|---|
| <b>Renal Damage</b>       | 2.26E-01 - 2.26E-01 | 1 |
| <b>Glomerular Injury</b>  | 4.11E-01 - 4.11E-01 | 1 |
| <b>Renal Inflammation</b> | 4.11E-01 - 4.11E-01 | 1 |

## Top Regulator Effect Networks

## Top Networks

| ID       | Associated Network Functions                                                                                                       | Score |
|----------|------------------------------------------------------------------------------------------------------------------------------------|-------|
| <b>1</b> | Cancer, Cell Death and Survival, Organismal Injury and Abnormalities                                                               | 37    |
| <b>2</b> | Neurological Disease, Organismal Injury and Abnormalities, Nervous System Development and Function                                 | 32    |
| <b>3</b> | Drug Metabolism, Endocrine System Development and Function, Energy Production                                                      | 23    |
| <b>4</b> | Cellular Assembly and Organization, RNA Post-Transcriptional Modification, Auditory and Vestibular System Development and Function | 11    |

## Top Tox Lists

| Name                                                | p-value  | Overlap     |
|-----------------------------------------------------|----------|-------------|
| <b>PXR/RXR Activation</b>                           | 3.48E-04 | 30.0 % 3/10 |
| <b>Renal Glomerulus Panel (Human)</b>               | 1.49E-02 | 100.0 % 1/1 |
| <b>Hepatic Cholestasis</b>                          | 1.53E-02 | 15.4 % 2/13 |
| <b>Xenobiotic Metabolism Signaling</b>              | 1.68E-02 | 6.0 % 4/67  |
| <b>LPS/IL-1 Mediated Inhibition of RXR Function</b> | 2.24E-02 | 7.3 % 3/41  |

## Top My Lists

## Top My Pathways

## Top Analysis-Ready Molecules

## Expr Fold Change

| Molecules      | Expr. Value | Chart |
|----------------|-------------|-------|
| <b>HPGDS*</b>  | ↑ 5.750     |       |
| <b>SLC50A1</b> | ↑ 5.399     |       |
| <b>GSTO1*</b>  | ↑ 4.079     |       |

|        |         |
|--------|---------|
| DST*   | ↑ 2.568 |
| DYSF   | ↑ 2.494 |
| PNPLA7 | ↑ 2.290 |
| GLRX3  | ↑ 2.042 |
| GLRA1  | ↑ 2.035 |
| PDXK   | ↑ 2.006 |
| AQR    | ↑ 1.910 |

**Expr Fold Change**

| Molecules       | Expr. Value | Chart |
|-----------------|-------------|-------|
| ABCB9           | ↓ -2.271    |       |
| ABHD11          | ↓ -2.209    |       |
| PLCE1           | ↓ -2.120    |       |
| HTR2A           | ↓ -2.076    |       |
| TTC21B          | ↓ -1.927    |       |
| PIGW            | ↓ -1.849    |       |
| COQ2            | ↓ -1.838    |       |
| CYP3A7-CYP3A51P | ↓ -1.794    |       |
| PRKACB          | ↓ -1.772    |       |
| NIM1K           | ↓ -1.621    |       |

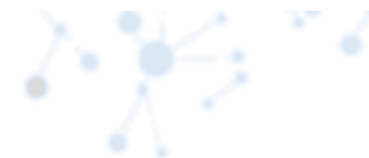

Analysis Name: DMAxWater\_p0.05\_FC\_1.5\_CLEAN - 2020-12-23 03:26 PM

Analysis Creation Date: 2020-12-23

Build version: exported

Content version: 60467501 (Release Date: 2020-11-19)

### Experiment Metadata

| Name                | Value                  |
|---------------------|------------------------|
| originalColumnNames | GENEBANKACC,GEN_ID_MFR |

### Analysis Settings

Reference set: C. elegans (V2)

Relationship to include: Direct and Indirect

Includes Endogenous Chemicals

Optional Analyses: My Pathways My List

Filter Summary:

Consider only molecules and/or relationships where

(species = Mouse OR Rat OR Human OR Uncategorized) AND

(confidence = Experimentally Observed) AND

(tissues/cell lines = Monocyte-derived macrophage OR Other Monocytes OR Other Breast Cancer Cell Lines OR SF-295 OR Mast cells OR

Other Granulocytes OR HS 578T OR Lung Cancer Cell Lines not otherwise specified OR Lymphoma Cell Lines not otherwise specified OR

Other NK cells OR Adipocytes OR Other Ovarian Cancer Cell Lines OR B lymphocytes not otherwise specified OR Pro-B lymphocytes OR 3T3-

L1 cells OR Adipose OR Kidney Cancer Cell Lines not otherwise specified OR Dorsal Root Ganglion OR OVCAR-3 OR Immature monocyte-derived dendritic cells OR Min6 OR Pheochromocytoma cell lines not otherwise specified OR Epithelial cells not otherwise specified OR Macrophages not otherwise specified OR Th17 cells OR Peripheral blood leukocytes not otherwise specified OR Bladder OR Other CNS Cell Lines OR OVCAR-5 OR Brain OR Heart OR Gray Matter OR Organ Systems not otherwise specified OR Smooth Muscle OR MDA-N OR RKO OR Hepatocytes OR Other Macrophages OR RAW 264.7 OR Adrenal Gland OR Hippocampus OR Microglia OR Cos-7 cells OR Granule Cell Layer OR Mammary Gland OR Spinal Cord OR SF-268 OR Ventricular Zone OR Naive B cells OR HCT-116 OR Activated Vd2 Gamma-delta T cells OR Th1 cells OR Parietal Lobe OR J774 OR OVCAR-4 OR U251 OR Thymus OR Other Mononuclear leukocytes OR HepG2 OR OVCAR-8 OR Caudate Nucleus OR HuH7 OR Lens OR Melanocytes OR NCI-H332M OR U2OS OR HOP-62 OR Jurkat OR Bone marrow-derived macrophages OR MDA-MB-361 OR Bone marrow-derived dendritic cells OR Sciatic Nerve OR Other Immune cells OR HT29 OR Other Colon Cancer Cell Lines OR Naive helper T cells OR Small Intestine OR NCI-H226 OR Astrocytes OR Blood platelets OR WEHI-231 OR Other Peripheral blood leukocytes OR Brainstem OR Kidney cell lines not otherwise specified OR Choroid Plexus OR Medulla Oblongata OR NB4 OR THP-1 OR Oocytes OR INS-1 OR K-562 OR Other Endothelial cells OR CAKI-1 OR RBL-2H3 OR Other Memory T lymphocytes OR T lymphocytes not otherwise specified OR H460 OR A375 OR Monocyte-derived dendritic cells not otherwise specified OR A549-ATCC OR PC-3 OR MALME-3M OR Beta islet cells OR HeLa OR HL-60 OR HOP-92 OR Memory B cells OR CD56bright NK cells OR SR OR Other Myeloma Cell Lines OR Cytotoxic T cells OR Cervical cancer cell line not otherwise specified OR SN12C OR Effector memory RA+ cytotoxic T cells OR BT-549 OR Purkinje cells OR Prostate Cancer Cell Lines not otherwise specified OR Other Macrophage Cancer Cell Lines OR Langerhans cells OR Osteosarcoma Cell Lines not otherwise specified OR T47-D OR Cerebellum OR Microvascular endothelial cells OR Other Cell Line OR Lymphocytes not otherwise specified OR HMC-1 OR Other Fibroblast cell lines OR PANC-1 OR Calvaria OR SW-480 OR Neutrophils OR Other Lymphocytes OR Other Lymphoma Cell Lines OR LNCaP cells OR SK-MEL-28 OR Swiss 3T3 cells OR CD4+ T-lymphocytes OR Crypt OR Other Lung Cancer Cell Lines OR J-774A.1 OR KM-12 OR Megakaryocytes OR Skin OR Kidney OR Other Melanoma Cell Lines OR Natural T-regulatory cells OR Bone marrow cells not otherwise specified OR Cartilage Tissue OR IGROV1 OR SW-620 OR Monocytes not otherwise specified OR Other Leukemia Cell Lines OR Other Teratocarcinoma Cell Lines OR Vd1 Gamma-delta T cells OR Prostate Gland OR Cortical neurons OR Other Smooth muscle cells OR UO-31 OR Trachea OR Olfactory Bulb OR Testis OR Ovarian Cancer Cell Lines not otherwise specified OR SF-539 OR Activated helper T cells OR Activated Vd1 Gamma-delta T cells OR Other Osteosarcoma Cell Lines OR Teratocarcinoma Cell Lines not otherwise specified OR Endothelial cells not otherwise specified OR U266 OR Amygdala OR Effector memory cytotoxic T cells OR Other Neurons OR Esophagus OR Peritoneal macrophages OR Salivary Gland OR SNB-75 OR CD56dim NK cells OR Keratinocytes OR Subventricular Zone OR Mesenchymal stem cells OR Cells not otherwise specified OR A498 OR ACHN OR Other Cervical cancer cell line OR Ovary OR Dendritic cells not otherwise specified OR Stomach OR HEL OR Thalamus OR Activated CD56bright NK cells OR HCC-2998 OR Other Tissues and Primary Cells OR Other Nervous System OR Pancreatic Cancer Cell Lines not otherwise specified OR Spleen

OR Other Kidney cell lines OR NCI-H522 OR Striatum OR NCI-ADR-RES OR Cardiomyocytes OR Peripheral blood monocytes OR U87MG OR Activated CD56dim NK cells OR MDA-MB-231 OR Mature monocyte-derived dendritic cells OR Leukemia Cell Lines not otherwise specified OR Th2 cells OR Intraepithelial T lymphocytes OR Fibroblast cell lines not otherwise specified OR Chondrocytes OR CNS Cell Lines not otherwise specified OR Mononuclear leukocytes not otherwise specified OR CD34+ cells OR Effector T cells OR Pancreas OR Forestomach OR Other Hepatoma Cell Lines OR Other Kidney Cancer Cell Lines OR Uterus OR NIH/3T3 cells OR Central memory cytotoxic T cells OR Plasma cells OR MDA-MB-435 OR Other Neuroblastoma Cell Lines OR Hematopoietic progenitor cells OR Other Dendritic cells OR Neurons not otherwise specified OR Smooth muscle cells not otherwise specified OR Neuroblastoma Cell Lines not otherwise specified OR Fibroblasts OR Other Cells OR UACC-62 OR Placenta OR White Matter OR Other Pheochromocytoma cell lines OR Cerebral Cortex OR Pituitary Gland OR NT2/D1 OR Other Organ Systems OR Cerebral Ventricles OR Peripheral blood lymphocytes OR DU-145 OR Corpus Callosum OR Large Intestine OR PC-12 cells OR CCRF-CEM OR Vascular smooth muscle cells OR Hepatoma Cell Lines not otherwise specified OR Tissues and Primary Cells not otherwise specified OR BA/F3 OR BDCA-3+ dendritic cells OR M14 OR Other Bone marrow cells OR Granule cells OR COLO205 OR A2780 OR Nucleus Accumbens OR Thymocytes OR Other Monocyte-derived dendritic cells OR Granulocytes not otherwise specified OR Osteoblasts OR NK cells not otherwise specified OR Granulosa cells OR Pyramidal neurons OR LOX IMVI OR MCF7 OR EKVX OR MOLT-4 OR Colon Cancer Cell Lines not otherwise specified OR Melanoma Cell Lines not otherwise specified OR Stem cells not otherwise specified OR Epidermis OR Skeletal Muscle OR U937 OR Immune cell lines not otherwise specified OR Trigeminal Ganglion OR SK-MEL-2 OR UACC-257 OR Cornea OR Other Stem cells OR Dermis OR Splenocytes OR Thyroid Gland OR Liver OR Breast Cancer Cell Lines not otherwise specified OR Substantia Nigra OR Macrophage Cancer Cell Lines not otherwise specified OR MDA-MB-468 OR Eosinophils OR Other T lymphocytes OR Myeloma Cell Lines not otherwise specified OR Nervous System not otherwise specified OR Hep3B OR Other Immune cell lines OR SK-OV-3 OR Myeloid dendritic cells OR PBMCs OR Other B lymphocytes OR 293 cells OR Other Epithelial cells OR Memory T lymphocytes not otherwise specified OR Murine NKT cells OR Vd2 Gamma-delta T cells OR Cell Line not otherwise specified OR Hypothalamus OR Plasmacytoid dendritic cells OR MEF cells OR NCI-H23 OR SK-MEL-5 OR Retina OR Pre-B lymphocytes OR Caco2 cells OR Immune cells not otherwise specified OR Stromal cells OR 786-0 OR HUVEC cells OR Lung OR Embryonic stem cells OR P19 OR Putamen OR Lymph node OR TK-10 OR RPMI-8266 OR BT-474 OR Other Pancreatic Cancer Cell Lines OR Other Prostate Cancer Cell Lines OR MG-63 OR Central memory helper T cells OR HCT-15 OR Effector memory helper T cells OR Sertoli cells OR SK-N-SH OR BDCA-1+ dendritic cells OR RXF-393) AND (mol. types = biologic drug OR canonical pathway OR chemical - endogenous mammalian OR chemical - endogenous non-mammalian OR chemical - kinase inhibitor OR chemical - other OR chemical - protease inhibitor OR chemical drug OR chemical reagent OR chemical toxicant OR complex OR cytokine OR disease OR enzyme OR function OR fusion gene/product OR G-protein coupled receptor OR group OR growth factor OR ion channel OR kinase OR ligand-dependent nuclear receptor OR mature microRNA OR microRNA OR other OR peptidase OR phosphatase OR transcription regulator OR translation regulator OR transmembrane receptor OR transporter) AND

(data sources = An Open Access Database of Genome-wide Association Results OR BIND OR BioGRID OR Catalogue Of Somatic Mutations In Cancer (COSMIC) OR Chemical Carcinogenesis Research Information System (CCRIS) OR ClinicalTrials.gov OR ClinVar OR Cognia OR DIP OR DrugBank OR Gene Ontology (GO) OR GVK Biosciences OR Hazardous Substances Data Bank (HSDB) OR HumanCyc OR Ingenuity Expert Findings OR Ingenuity ExpertAssist Findings OR IntAct OR Interactome studies OR MIPS OR miRBase OR miRecords OR Mouse Genome Database (MGD) OR Obesity Gene Map Database OR Online Mendelian Inheritance in Man (OMIM) OR TarBase OR TargetScan Human)

### Top Canonical Pathways

| Name                                        | p-value  | Overlap     |
|---------------------------------------------|----------|-------------|
| <b>Glutathione-mediated Detoxification</b>  | 1.96E-03 | 50.0 % 2/4  |
| <b>G-Protein Coupled Receptor Signaling</b> | 4.50E-03 | 8.3 % 5/60  |
| <b>Gustation Pathway</b>                    | 6.24E-03 | 14.3 % 3/21 |
| <b>cAMP-mediated signaling</b>              | 6.90E-03 | 9.5 % 4/42  |
| <b>Gi Signaling</b>                         | 1.40E-02 | 10.7 % 3/28 |

### Top Upstream Regulators

#### Upstream Regulators

| Name                            | p-value  | Predicted Activation |
|---------------------------------|----------|----------------------|
| <b>STIM1</b>                    | 3.47E-04 |                      |
| <b>FABP5</b>                    | 3.47E-04 |                      |
| <b>tacrolimus</b>               | 8.99E-04 |                      |
| <b>galactosylceramide-alpha</b> | 1.03E-03 |                      |

**ALDH3A2**

1.03E-03

**Causal Network**

| Name                  | p-value  | Predicted Activation |
|-----------------------|----------|----------------------|
| <b>RALBP1</b>         | 2.83E-05 |                      |
| <b>chlorpropamide</b> | 7.06E-05 |                      |
| <b>glabridin</b>      | 9.12E-05 |                      |
| <b>octanoic acid</b>  | 1.31E-04 |                      |
| <b>HFE</b>            | 1.65E-04 |                      |

**Top Diseases and Bio Functions****Diseases and Disorders**

| Name                                       | p-value range       | # Molecules |
|--------------------------------------------|---------------------|-------------|
| <b>Neurological Disease</b>                | 1.84E-02 - 3.06E-07 | 27          |
| <b>Cardiovascular Disease</b>              | 1.84E-02 - 2.42E-06 | 21          |
| <b>Organismal Injury and Abnormalities</b> | 1.84E-02 - 2.42E-06 | 57          |
| <b>Respiratory Disease</b>                 | 1.84E-02 - 1.70E-05 | 15          |
| <b>Skeletal and Muscular Disorders</b>     | 1.84E-02 - 1.77E-05 | 22          |

**Molecular and Cellular Functions**



| Name                                          | p-value range       | # Molecules |
|-----------------------------------------------|---------------------|-------------|
| <b>Cellular Development</b>                   | 1.84E-02 - 5.74E-05 | 18          |
| <b>Cellular Function and Maintenance</b>      | 1.84E-02 - 5.74E-05 | 24          |
| <b>Cellular Growth and Proliferation</b>      | 1.84E-02 - 5.74E-05 | 11          |
| <b>Cell Death and Survival</b>                | 1.84E-02 - 3.12E-04 | 14          |
| <b>Cell-To-Cell Signaling and Interaction</b> | 1.84E-02 - 3.34E-04 | 11          |

### Physiological System Development and Function

| Name                                                  | p-value range       | # Molecules |
|-------------------------------------------------------|---------------------|-------------|
| <b>Cardiovascular System Development and Function</b> | 1.84E-02 - 5.74E-05 | 16          |
| <b>Organismal Development</b>                         | 1.84E-02 - 5.74E-05 | 21          |
| <b>Tissue Development</b>                             | 1.84E-02 - 5.74E-05 | 18          |
| <b>Nervous System Development and Function</b>        | 1.84E-02 - 1.14E-04 | 19          |
| <b>Hematological System Development and Function</b>  | 1.84E-02 - 2.07E-04 | 15          |

### Top Tox Functions

### Assays: Clinical Chemistry and Hematology

| Name                                 | p-value range       | # Molecules |
|--------------------------------------|---------------------|-------------|
| <b>Increased Levels of Potassium</b> | 7.17E-02 - 7.17E-02 | 1           |
| <b>Decreased Levels of Potassium</b> | 8.89E-02 - 8.89E-02 | 1           |

**Increased Levels of Red Blood Cells**

1.85E-01 - 1.85E-01

1

**Cardiotoxicity**

| Name                        | p-value range       | # Molecules |
|-----------------------------|---------------------|-------------|
| <b>Cardiac Arteriopathy</b> | 4.36E-02 - 2.42E-06 | 9           |
| <b>Cardiac Infarction</b>   | 2.44E-01 - 1.77E-05 | 7           |
| <b>Heart Failure</b>        | 2.44E-01 - 9.90E-04 | 6           |
| <b>Cardiac Arrhythmia</b>   | 2.15E-01 - 1.99E-03 | 4           |
| <b>Cardiac Inflammation</b> | 5.43E-02 - 8.71E-03 | 2           |

**Hepatotoxicity**

| Name                                        | p-value range       | # Molecules |
|---------------------------------------------|---------------------|-------------|
| <b>Liver Hyperplasia/Hyperproliferation</b> | 3.61E-01 - 1.08E-03 | 37          |
| <b>Liver Damage</b>                         | 2.81E-03 - 2.81E-03 | 3           |
| <b>Liver Inflammation/Hepatitis</b>         | 4.07E-01 - 4.83E-03 | 5           |
| <b>Liver Steatosis</b>                      | 1.85E-01 - 1.14E-02 | 4           |
| <b>Liver Failure</b>                        | 5.43E-02 - 3.01E-02 | 2           |

**Nephrotoxicity**

| Name                | p-value range       | # Molecules |
|---------------------|---------------------|-------------|
| <b>Renal Damage</b> | 2.15E-01 - 1.75E-03 | 5           |

|                          |                     |   |
|--------------------------|---------------------|---|
| <b>Kidney Failure</b>    | 5.43E-02 - 1.96E-03 | 3 |
| <b>Renal Hypoplasia</b>  | 1.22E-01 - 3.65E-02 | 1 |
| <b>Glomerular Injury</b> | 1.38E-01 - 7.17E-02 | 2 |
| <b>Renal Enlargement</b> | 1.06E-01 - 1.06E-01 | 1 |

**Top Regulator Effect Networks**

**Top Networks**

| ID | Associated Network Functions                                                                  | Score |
|----|-----------------------------------------------------------------------------------------------|-------|
| 1  | Cardiac Infarction, Cardiovascular Disease, Organismal Injury and Abnormalities               | 44    |
| 2  | Cell Cycle, Cardiovascular System Development and Function, Cell Morphology                   | 33    |
| 3  | Behavior, Nervous System Development and Function, DNA Replication, Recombination, and Repair | 25    |
| 4  | Lipid Metabolism, Small Molecule Biochemistry, Molecular Transport                            | 17    |

5

Cellular Development,  
Embryonic  
Development,  
Organismal  
Development

3

## Top Tox Lists

| Name                                                              | p-value  | Overlap     |
|-------------------------------------------------------------------|----------|-------------|
| <b>LPS/IL-1 Mediated Inhibition of RXR Function</b>               | 6.33E-03 | 9.8 % 4/41  |
| <b>Long-term Renal Injury Anti-oxidative Response Panel (Rat)</b> | 6.61E-03 | 28.6 % 2/7  |
| <b>Cytochrome P450 Panel - Substrate is a Fatty Acid (Human)</b>  | 1.84E-02 | 100.0 % 1/1 |
| <b>Cytochrome P450 Panel - Substrate is a Fatty Acid (Mouse)</b>  | 1.84E-02 | 100.0 % 1/1 |
| <b>Cytochrome P450 Panel - Substrate is a Fatty Acid (Rat)</b>    | 1.84E-02 | 100.0 % 1/1 |

## Top My Lists

## Top My Pathways

## Top Analysis-Ready Molecules

**Expr Fold Change**

| Molecules      | Expr. Value | Chart |
|----------------|-------------|-------|
| <b>PIPOX</b>   | ↑ 25.365    |       |
| <b>HPGDS*</b>  | ↑ 10.437    |       |
| <b>FABP4*</b>  | ↑ 7.204     |       |
| <b>GSTO1*</b>  | ↑ 5.269     |       |
| <b>CYP2J2*</b> | ↑ 4.562     |       |
| <b>WVOX*</b>   | ↑ 4.276     |       |
| <b>GLRA1</b>   | ↑ 2.562     |       |
| <b>PNPLA7</b>  | ↑ 2.204     |       |
| <b>KCNJ2</b>   | ↑ 2.118     |       |
| <b>PGPEP1</b>  | ↑ 2.114     |       |

**Expr Fold Change**

| Molecules               | Expr. Value | Chart |
|-------------------------|-------------|-------|
| <b>SRD5A2</b>           | ↓ -5.136    |       |
| <b>COMTD1</b>           | ↓ -4.537    |       |
| <b>SCNN1G*</b>          | ↓ -3.839    |       |
| <b>SLC20A2</b>          | ↓ -3.241    |       |
| <b>CYP3A7-CYP3A51P*</b> | ↓ -3.046    |       |
| <b>ARL6</b>             | ↓ -2.862    |       |
| <b>CAPN15</b>           | ↓ -2.673    |       |
| <b>PLEKHD1</b>          | ↓ -2.400    |       |
| <b>NEUROD6</b>          | ↓ -2.396    |       |
| <b>RAB28</b>            | ↓ -2.381    |       |



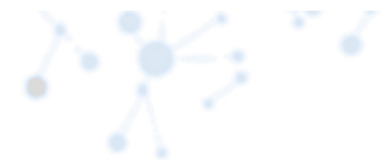

Analysis Name: HgCl2xWater\_p0.05\_FC1.5\_CLEAN - 2020-12-23 03:35 PM

Analysis Creation Date: 2020-12-23

Build version: exported

Content version: 60467501 (Release Date: 2020-11-19)

### Experiment Metadata

| Name                | Value                  |
|---------------------|------------------------|
| originalColumnNames | GENEBANKACC,GEN_ID_MFR |

### Analysis Settings

Reference set: C. elegans (V2)

Relationship to include: Direct and Indirect

Includes Endogenous Chemicals

Optional Analyses: My Pathways My List

Filter Summary:

Consider only molecules and/or relationships where

(species = Mouse OR Rat OR Human OR Uncategorized) AND

(confidence = Experimentally Observed) AND

(tissues/cell lines = Monocyte-derived macrophage OR Other Monocytes OR Other Breast Cancer Cell Lines OR SF-295 OR Mast cells OR

Other Granulocytes OR HS 578T OR Lung Cancer Cell Lines not otherwise specified OR Lymphoma Cell Lines not otherwise specified OR

Other NK cells OR Adipocytes OR Other Ovarian Cancer Cell Lines OR B lymphocytes not otherwise specified OR Pro-B lymphocytes OR 3T3-

L1 cells OR Adipose OR Kidney Cancer Cell Lines not otherwise specified OR Dorsal Root Ganglion OR OVCAR-3 OR Immature monocyte-derived dendritic cells OR Min6 OR Pheochromocytoma cell lines not otherwise specified OR Epithelial cells not otherwise specified OR Macrophages not otherwise specified OR Th17 cells OR Peripheral blood leukocytes not otherwise specified OR Bladder OR Other CNS Cell Lines OR OVCAR-5 OR Brain OR Heart OR Gray Matter OR Organ Systems not otherwise specified OR Smooth Muscle OR MDA-N OR RKO OR Hepatocytes OR Other Macrophages OR RAW 264.7 OR Adrenal Gland OR Hippocampus OR Microglia OR Cos-7 cells OR Granule Cell Layer OR Mammary Gland OR Spinal Cord OR SF-268 OR Ventricular Zone OR Naive B cells OR HCT-116 OR Activated Vd2 Gamma-delta T cells OR Th1 cells OR Parietal Lobe OR J774 OR OVCAR-4 OR U251 OR Thymus OR Other Mononuclear leukocytes OR HepG2 OR OVCAR-8 OR Caudate Nucleus OR HuH7 OR Lens OR Melanocytes OR NCI-H332M OR U2OS OR HOP-62 OR Jurkat OR Bone marrow-derived macrophages OR MDA-MB-361 OR Bone marrow-derived dendritic cells OR Sciatic Nerve OR Other Immune cells OR HT29 OR Other Colon Cancer Cell Lines OR Naive helper T cells OR Small Intestine OR NCI-H226 OR Astrocytes OR Blood platelets OR WEHI-231 OR Other Peripheral blood leukocytes OR Brainstem OR Kidney cell lines not otherwise specified OR Choroid Plexus OR Medulla Oblongata OR NB4 OR THP-1 OR Oocytes OR INS-1 OR K-562 OR Other Endothelial cells OR CAKI-1 OR RBL-2H3 OR Other Memory T lymphocytes OR T lymphocytes not otherwise specified OR H460 OR A375 OR Monocyte-derived dendritic cells not otherwise specified OR A549-ATCC OR PC-3 OR MALME-3M OR Beta islet cells OR HeLa OR HL-60 OR HOP-92 OR Memory B cells OR CD56bright NK cells OR SR OR Other Myeloma Cell Lines OR Cytotoxic T cells OR Cervical cancer cell line not otherwise specified OR SN12C OR Effector memory RA+ cytotoxic T cells OR BT-549 OR Purkinje cells OR Prostate Cancer Cell Lines not otherwise specified OR Other Macrophage Cancer Cell Lines OR Langerhans cells OR Osteosarcoma Cell Lines not otherwise specified OR T47-D OR Cerebellum OR Microvascular endothelial cells OR Other Cell Line OR Lymphocytes not otherwise specified OR HMC-1 OR Other Fibroblast cell lines OR PANC-1 OR Calvaria OR SW-480 OR Neutrophils OR Other Lymphocytes OR Other Lymphoma Cell Lines OR LNCaP cells OR SK-MEL-28 OR Swiss 3T3 cells OR CD4+ T-lymphocytes OR Crypt OR Other Lung Cancer Cell Lines OR J-774A.1 OR KM-12 OR Megakaryocytes OR Skin OR Kidney OR Other Melanoma Cell Lines OR Natural T-regulatory cells OR Bone marrow cells not otherwise specified OR Cartilage Tissue OR IGROV1 OR SW-620 OR Monocytes not otherwise specified OR Other Leukemia Cell Lines OR Other Teratocarcinoma Cell Lines OR Vd1 Gamma-delta T cells OR Prostate Gland OR Cortical neurons OR Other Smooth muscle cells OR UO-31 OR Trachea OR Olfactory Bulb OR Testis OR Ovarian Cancer Cell Lines not otherwise specified OR SF-539 OR Activated helper T cells OR Activated Vd1 Gamma-delta T cells OR Other Osteosarcoma Cell Lines OR Teratocarcinoma Cell Lines not otherwise specified OR Endothelial cells not otherwise specified OR U266 OR Amygdala OR Effector memory cytotoxic T cells OR Other Neurons OR Esophagus OR Peritoneal macrophages OR Salivary Gland OR SNB-75 OR CD56dim NK cells OR Keratinocytes OR Subventricular Zone OR Mesenchymal stem cells OR Cells not otherwise specified OR A498 OR ACHN OR Other Cervical cancer cell line OR Ovary OR Dendritic cells not otherwise specified OR Stomach OR HEL OR Thalamus OR Activated CD56bright NK cells OR HCC-2998 OR Other Tissues and Primary Cells OR Other Nervous System OR Pancreatic Cancer Cell Lines not otherwise specified OR Spleen



OR Other Kidney cell lines OR NCI-H522 OR Striatum OR NCI-ADR-RES OR Cardiomyocytes OR Peripheral blood monocytes OR U87MG OR Activated CD56dim NK cells OR MDA-MB-231 OR Mature monocyte-derived dendritic cells OR Leukemia Cell Lines not otherwise specified OR Th2 cells OR Intraepithelial T lymphocytes OR Fibroblast cell lines not otherwise specified OR Chondrocytes OR CNS Cell Lines not otherwise specified OR Mononuclear leukocytes not otherwise specified OR CD34+ cells OR Effector T cells OR Pancreas OR Forestomach OR Other Hepatoma Cell Lines OR Other Kidney Cancer Cell Lines OR Uterus OR NIH/3T3 cells OR Central memory cytotoxic T cells OR Plasma cells OR MDA-MB-435 OR Other Neuroblastoma Cell Lines OR Hematopoietic progenitor cells OR Other Dendritic cells OR Neurons not otherwise specified OR Smooth muscle cells not otherwise specified OR Neuroblastoma Cell Lines not otherwise specified OR Fibroblasts OR Other Cells OR UACC-62 OR Placenta OR White Matter OR Other Pheochromocytoma cell lines OR Cerebral Cortex OR Pituitary Gland OR NT2/D1 OR Other Organ Systems OR Cerebral Ventricles OR Peripheral blood lymphocytes OR DU-145 OR Corpus Callosum OR Large Intestine OR PC-12 cells OR CCRF-CEM OR Vascular smooth muscle cells OR Hepatoma Cell Lines not otherwise specified OR Tissues and Primary Cells not otherwise specified OR BA/F3 OR BDCA-3+ dendritic cells OR M14 OR Other Bone marrow cells OR Granule cells OR COLO205 OR A2780 OR Nucleus Accumbens OR Thymocytes OR Other Monocyte-derived dendritic cells OR Granulocytes not otherwise specified OR Osteoblasts OR NK cells not otherwise specified OR Granulosa cells OR Pyramidal neurons OR LOX IMVI OR MCF7 OR EKVX OR MOLT-4 OR Colon Cancer Cell Lines not otherwise specified OR Melanoma Cell Lines not otherwise specified OR Stem cells not otherwise specified OR Epidermis OR Skeletal Muscle OR U937 OR Immune cell lines not otherwise specified OR Trigeminal Ganglion OR SK-MEL-2 OR UACC-257 OR Cornea OR Other Stem cells OR Dermis OR Splenocytes OR Thyroid Gland OR Liver OR Breast Cancer Cell Lines not otherwise specified OR Substantia Nigra OR Macrophage Cancer Cell Lines not otherwise specified OR MDA-MB-468 OR Eosinophils OR Other T lymphocytes OR Myeloma Cell Lines not otherwise specified OR Nervous System not otherwise specified OR Hep3B OR Other Immune cell lines OR SK-OV-3 OR Myeloid dendritic cells OR PBMCs OR Other B lymphocytes OR 293 cells OR Other Epithelial cells OR Memory T lymphocytes not otherwise specified OR Murine NKT cells OR Vd2 Gamma-delta T cells OR Cell Line not otherwise specified OR Hypothalamus OR Plasmacytoid dendritic cells OR MEF cells OR NCI-H23 OR SK-MEL-5 OR Retina OR Pre-B lymphocytes OR Caco2 cells OR Immune cells not otherwise specified OR Stromal cells OR 786-0 OR HUVEC cells OR Lung OR Embryonic stem cells OR P19 OR Putamen OR Lymph node OR TK-10 OR RPMI-8266 OR BT-474 OR Other Pancreatic Cancer Cell Lines OR Other Prostate Cancer Cell Lines OR MG-63 OR Central memory helper T cells OR HCT-15 OR Effector memory helper T cells OR Sertoli cells OR SK-N-SH OR BDCA-1+ dendritic cells OR RXF-393) AND (mol. types = biologic drug OR canonical pathway OR chemical - endogenous mammalian OR chemical - endogenous non-mammalian OR chemical - kinase inhibitor OR chemical - other OR chemical - protease inhibitor OR chemical drug OR chemical reagent OR chemical toxicant OR complex OR cytokine OR disease OR enzyme OR function OR fusion gene/product OR G-protein coupled receptor OR group OR growth factor OR ion channel OR kinase OR ligand-dependent nuclear receptor OR mature microRNA OR microRNA OR other OR peptidase OR phosphatase OR transcription regulator OR translation regulator OR transmembrane receptor OR transporter) AND

(data sources = An Open Access Database of Genome-wide Association Results OR BIND OR BioGRID OR Catalogue Of Somatic Mutations In Cancer (COSMIC) OR Chemical Carcinogenesis Research Information System (CCRIS) OR ClinicalTrials.gov OR ClinVar OR Cognia OR DIP OR DrugBank OR Gene Ontology (GO) OR GVK Biosciences OR Hazardous Substances Data Bank (HSDB) OR HumanCyc OR Ingenuity Expert Findings OR Ingenuity ExpertAssist Findings OR IntAct OR Interactome studies OR MIPS OR miRBase OR miRecords OR Mouse Genome Database (MGD) OR Obesity Gene Map Database OR Online Mendelian Inheritance in Man (OMIM) OR TarBase OR TargetScan Human)

### Top Canonical Pathways

| Name                                                | p-value  | Overlap     |
|-----------------------------------------------------|----------|-------------|
| <b>PXR/RXR Activation</b>                           | 1.04E-03 | 30.0 % 3/10 |
| <b>Calcium Transport I</b>                          | 1.36E-03 | 66.7 % 2/3  |
| <b>Calcium Signaling</b>                            | 2.07E-03 | 11.6 % 5/43 |
| <b>Sertoli Cell-Sertoli Cell Junction Signaling</b> | 7.70E-03 | 10.8 % 4/37 |
| <b>NAD Salvage Pathway II</b>                       | 1.18E-02 | 25.0 % 2/8  |

### Top Upstream Regulators

#### Upstream Regulators

| Name          | p-value  | Predicted Activation |
|---------------|----------|----------------------|
| <b>MAFG</b>   | 1.85E-04 |                      |
| <b>MAFK</b>   | 1.85E-04 |                      |
| <b>SLC51A</b> | 4.61E-04 |                      |
| <b>MYT1</b>   | 4.61E-04 |                      |

**SLC10A1**

4.61E-04

**Causal Network**

| Name             | p-value  | Predicted Activation |
|------------------|----------|----------------------|
| <b>MAFG</b>      | 9.40E-05 |                      |
| <b>MAFK</b>      | 1.85E-04 |                      |
| <b>MYT1</b>      | 4.61E-04 |                      |
| <b>SLC10A1</b>   | 4.61E-04 |                      |
| <b>bile salt</b> | 4.61E-04 |                      |

**Top Diseases and Bio Functions****Diseases and Disorders**

| Name                                          | p-value range       | # Molecules |
|-----------------------------------------------|---------------------|-------------|
| <b>Cancer</b>                                 | 4.15E-02 - 2.30E-04 | 66          |
| <b>Organismal Injury and Abnormalities</b>    | 4.28E-02 - 2.30E-04 | 68          |
| <b>Dermatological Diseases and Conditions</b> | 2.36E-02 - 4.13E-04 | 54          |
| <b>Reproductive System Disease</b>            | 4.14E-02 - 4.51E-04 | 51          |
| <b>Hereditary Disorder</b>                    | 4.17E-02 - 4.60E-04 | 26          |

**Molecular and Cellular Functions**

| Name                                     | p-value range       | # Molecules |
|------------------------------------------|---------------------|-------------|
| <b>Molecular Transport</b>               | 4.28E-02 - 1.25E-05 | 28          |
| <b>Cellular Function and Maintenance</b> | 4.14E-02 - 2.09E-05 | 35          |
| <b>Small Molecule Biochemistry</b>       | 4.28E-02 - 2.20E-04 | 21          |
| <b>Cell Death and Survival</b>           | 4.28E-02 - 4.24E-04 | 35          |
| <b>Lipid Metabolism</b>                  | 2.16E-02 - 4.60E-04 | 10          |

### Physiological System Development and Function

| Name                                                  | p-value range       | # Molecules |
|-------------------------------------------------------|---------------------|-------------|
| <b>Cardiovascular System Development and Function</b> | 4.28E-02 - 1.36E-03 | 13          |
| <b>Nervous System Development and Function</b>        | 4.28E-02 - 1.36E-03 | 16          |
| <b>Organ Development</b>                              | 4.28E-02 - 1.36E-03 | 9           |
| <b>Organ Morphology</b>                               | 4.28E-02 - 1.36E-03 | 14          |
| <b>Organismal Development</b>                         | 4.28E-02 - 1.36E-03 | 19          |

### Top Tox Functions

### Assays: Clinical Chemistry and Hematology

| Name                                  | p-value range       | # Molecules |
|---------------------------------------|---------------------|-------------|
| <b>Decreased Levels of Hematocrit</b> | 2.16E-02 - 2.16E-02 | 1           |
| <b>Increased Levels of Potassium</b>  | 1.42E-01 - 1.42E-01 | 1           |

**Cardiotoxicity**

| Name                              | p-value range       | # Molecules |
|-----------------------------------|---------------------|-------------|
| <b>Cardiac Stenosis</b>           | 1.18E-02 - 1.18E-02 | 2           |
| <b>Heart Failure</b>              | 1.07E-01 - 1.76E-02 | 5           |
| <b>Cardiac Arteriopathy</b>       | 6.12E-01 - 5.53E-02 | 4           |
| <b>Cardiac Arrythmia</b>          | 1.23E-01 - 6.35E-02 | 1           |
| <b>Cardiac Pulmonary Embolism</b> | 6.35E-02 - 6.35E-02 | 1           |

**Hepatotoxicity**

| Name                                        | p-value range       | # Molecules |
|---------------------------------------------|---------------------|-------------|
| <b>Hepatocellular carcinoma</b>             | 4.09E-01 - 2.16E-02 | 10          |
| <b>Liver Cholestasis</b>                    | 3.11E-01 - 2.16E-02 | 2           |
| <b>Liver Enlargement</b>                    | 2.16E-02 - 2.16E-02 | 1           |
| <b>Liver Hyperbilirubinemia</b>             | 2.16E-02 - 2.16E-02 | 1           |
| <b>Liver Hyperplasia/Hyperproliferation</b> | 4.09E-01 - 2.16E-02 | 38          |

**Nephrotoxicity**

| Name                     | p-value range       | # Molecules |
|--------------------------|---------------------|-------------|
| <b>Kidney Failure</b>    | 1.96E-01 - 2.68E-03 | 4           |
| <b>Renal Enlargement</b> | 1.23E-01 - 9.01E-03 | 2           |

|                             |                     |   |
|-----------------------------|---------------------|---|
| <b>Nephrosis</b>            | 1.29E-01 - 1.31E-02 | 4 |
| <b>Glomerular Injury</b>    | 1.96E-01 - 2.16E-02 | 2 |
| <b>Renal Hydronephrosis</b> | 2.16E-02 - 2.16E-02 | 1 |

### Top Regulator Effect Networks

### Top Networks

| ID       | Associated Network Functions                                                                       | Score |
|----------|----------------------------------------------------------------------------------------------------|-------|
| <b>1</b> | Cellular Function and Maintenance, Small Molecule Biochemistry, Cellular Assembly and Organization | 46    |
| <b>2</b> | Hereditary Disorder, Neurological Disease, Organismal Injury and Abnormalities                     | 46    |
| <b>3</b> | Inflammatory Response, Lipid Metabolism, Molecular Transport                                       | 34    |
| <b>4</b> | DNA Replication, Recombination, and Repair, Cancer, Cardiovascular Disease                         | 19    |
| <b>5</b> | Hematological Disease, Hereditary Disorder, Organismal Injury and Abnormalities                    | 6     |

Top Tox Lists

| Name                                                                                | p-value  | Overlap     |
|-------------------------------------------------------------------------------------|----------|-------------|
| <b>Genes Upregulated in Response to Chronic Renal Failure (Rat)</b>                 | 4.60E-04 | 100.0 % 2/2 |
| <b>PXR/RXR Activation</b>                                                           | 1.04E-03 | 30.0 % 3/10 |
| <b>CAR/RXR Activation</b>                                                           | 4.41E-03 | 40.0 % 2/5  |
| <b>Decreases Depolarization of Mitochondria and Mitochondrial Membrane</b>          | 1.18E-02 | 25.0 % 2/8  |
| <b>Decreases Transmembrane Potential of Mitochondria and Mitochondrial Membrane</b> | 1.41E-02 | 12.5 % 3/24 |

Top My Lists

Top My Pathways

Top Analysis-Ready Molecules

Expr Fold Change

| Molecules    | Expr. Value | Chart |
|--------------|-------------|-------|
| <b>ABCC4</b> | ↑ 2.669     |       |

|        |         |
|--------|---------|
| ATP1A3 | ↑ 2.176 |
| NUP93  | ↑ 1.951 |
| CCT7   | ↑ 1.944 |
| SNX33  | ↑ 1.923 |
| PKM    | ↑ 1.883 |
| SNX14  | ↑ 1.868 |
| ADSS1  | ↑ 1.840 |
| DHX37  | ↑ 1.832 |
| ABCC3  | ↑ 1.766 |

### Expr Fold Change

| Molecules       | Expr. Value | Chart |
|-----------------|-------------|-------|
| RASGRP3         | ↓ -2.811    |       |
| ASCC3           | ↓ -2.220    |       |
| PPP4R3A         | ↓ -2.201    |       |
| CAMK2D          | ↓ -2.015    |       |
| CAPN15          | ↓ -1.994    |       |
| DNAJC2          | ↓ -1.993    |       |
| SLC8A3          | ↓ -1.925    |       |
| VPS13D          | ↓ -1.914    |       |
| PNPLA4          | ↓ -1.791    |       |
| CYP3A7-CYP3A51P | ↓ -1.772    |       |





Analysis Name: meHgClxWater\_p0.05\_FC\_1.5\_CLEAN - 2020-12-23 03:34 PM

Analysis Creation Date: 2020-12-23

Build version: exported

Content version: 60467501 (Release Date: 2020-11-19)

### Experiment Metadata

| Name                | Value                  |
|---------------------|------------------------|
| originalColumnNames | GENEBANKACC,GEN_ID_MFR |

### Analysis Settings

Reference set: C. elegans (V2)

Relationship to include: Direct and Indirect

Includes Endogenous Chemicals

Optional Analyses: My Pathways My List

Filter Summary:

Consider only molecules and/or relationships where

(species = Mouse OR Rat OR Human OR Uncategorized) AND

(confidence = Experimentally Observed) AND

(tissues/cell lines = Monocyte-derived macrophage OR Other Monocytes OR Other Breast Cancer Cell Lines OR SF-295 OR Mast cells OR

Other Granulocytes OR HS 578T OR Lung Cancer Cell Lines not otherwise specified OR Lymphoma Cell Lines not otherwise specified OR

Other NK cells OR Adipocytes OR Other Ovarian Cancer Cell Lines OR B lymphocytes not otherwise specified OR Pro-B lymphocytes OR 3T3-

L1 cells OR Adipose OR Kidney Cancer Cell Lines not otherwise specified OR Dorsal Root Ganglion OR OVCAR-3 OR Immature monocyte-derived dendritic cells OR Min6 OR Pheochromocytoma cell lines not otherwise specified OR Epithelial cells not otherwise specified OR Macrophages not otherwise specified OR Th17 cells OR Peripheral blood leukocytes not otherwise specified OR Bladder OR Other CNS Cell Lines OR OVCAR-5 OR Brain OR Heart OR Gray Matter OR Organ Systems not otherwise specified OR Smooth Muscle OR MDA-N OR RKO OR Hepatocytes OR Other Macrophages OR RAW 264.7 OR Adrenal Gland OR Hippocampus OR Microglia OR Cos-7 cells OR Granule Cell Layer OR Mammary Gland OR Spinal Cord OR SF-268 OR Ventricular Zone OR Naive B cells OR HCT-116 OR Activated Vd2 Gamma-delta T cells OR Th1 cells OR Parietal Lobe OR J774 OR OVCAR-4 OR U251 OR Thymus OR Other Mononuclear leukocytes OR HepG2 OR OVCAR-8 OR Caudate Nucleus OR HuH7 OR Lens OR Melanocytes OR NCI-H332M OR U2OS OR HOP-62 OR Jurkat OR Bone marrow-derived macrophages OR MDA-MB-361 OR Bone marrow-derived dendritic cells OR Sciatic Nerve OR Other Immune cells OR HT29 OR Other Colon Cancer Cell Lines OR Naive helper T cells OR Small Intestine OR NCI-H226 OR Astrocytes OR Blood platelets OR WEHI-231 OR Other Peripheral blood leukocytes OR Brainstem OR Kidney cell lines not otherwise specified OR Choroid Plexus OR Medulla Oblongata OR NB4 OR THP-1 OR Oocytes OR INS-1 OR K-562 OR Other Endothelial cells OR CAKI-1 OR RBL-2H3 OR Other Memory T lymphocytes OR T lymphocytes not otherwise specified OR H460 OR A375 OR Monocyte-derived dendritic cells not otherwise specified OR A549-ATCC OR PC-3 OR MALME-3M OR Beta islet cells OR HeLa OR HL-60 OR HOP-92 OR Memory B cells OR CD56bright NK cells OR SR OR Other Myeloma Cell Lines OR Cytotoxic T cells OR Cervical cancer cell line not otherwise specified OR SN12C OR Effector memory RA+ cytotoxic T cells OR BT-549 OR Purkinje cells OR Prostate Cancer Cell Lines not otherwise specified OR Other Macrophage Cancer Cell Lines OR Langerhans cells OR Osteosarcoma Cell Lines not otherwise specified OR T47-D OR Cerebellum OR Microvascular endothelial cells OR Other Cell Line OR Lymphocytes not otherwise specified OR HMC-1 OR Other Fibroblast cell lines OR PANC-1 OR Calvaria OR SW-480 OR Neutrophils OR Other Lymphocytes OR Other Lymphoma Cell Lines OR LNCaP cells OR SK-MEL-28 OR Swiss 3T3 cells OR CD4+ T-lymphocytes OR Crypt OR Other Lung Cancer Cell Lines OR J-774A.1 OR KM-12 OR Megakaryocytes OR Skin OR Kidney OR Other Melanoma Cell Lines OR Natural T-regulatory cells OR Bone marrow cells not otherwise specified OR Cartilage Tissue OR IGROV1 OR SW-620 OR Monocytes not otherwise specified OR Other Leukemia Cell Lines OR Other Teratocarcinoma Cell Lines OR Vd1 Gamma-delta T cells OR Prostate Gland OR Cortical neurons OR Other Smooth muscle cells OR UO-31 OR Trachea OR Olfactory Bulb OR Testis OR Ovarian Cancer Cell Lines not otherwise specified OR SF-539 OR Activated helper T cells OR Activated Vd1 Gamma-delta T cells OR Other Osteosarcoma Cell Lines OR Teratocarcinoma Cell Lines not otherwise specified OR Endothelial cells not otherwise specified OR U266 OR Amygdala OR Effector memory cytotoxic T cells OR Other Neurons OR Esophagus OR Peritoneal macrophages OR Salivary Gland OR SNB-75 OR CD56dim NK cells OR Keratinocytes OR Subventricular Zone OR Mesenchymal stem cells OR Cells not otherwise specified OR A498 OR ACHN OR Other Cervical cancer cell line OR Ovary OR Dendritic cells not otherwise specified OR Stomach OR HEL OR Thalamus OR Activated CD56bright NK cells OR HCC-2998 OR Other Tissues and Primary Cells OR Other Nervous System OR Pancreatic Cancer Cell Lines not otherwise specified OR Spleen

OR Other Kidney cell lines OR NCI-H522 OR Striatum OR NCI-ADR-RES OR Cardiomyocytes OR Peripheral blood monocytes OR U87MG OR Activated CD56dim NK cells OR MDA-MB-231 OR Mature monocyte-derived dendritic cells OR Leukemia Cell Lines not otherwise specified OR Th2 cells OR Intraepithelial T lymphocytes OR Fibroblast cell lines not otherwise specified OR Chondrocytes OR CNS Cell Lines not otherwise specified OR Mononuclear leukocytes not otherwise specified OR CD34+ cells OR Effector T cells OR Pancreas OR Forestomach OR Other Hepatoma Cell Lines OR Other Kidney Cancer Cell Lines OR Uterus OR NIH/3T3 cells OR Central memory cytotoxic T cells OR Plasma cells OR MDA-MB-435 OR Other Neuroblastoma Cell Lines OR Hematopoietic progenitor cells OR Other Dendritic cells OR Neurons not otherwise specified OR Smooth muscle cells not otherwise specified OR Neuroblastoma Cell Lines not otherwise specified OR Fibroblasts OR Other Cells OR UACC-62 OR Placenta OR White Matter OR Other Pheochromocytoma cell lines OR Cerebral Cortex OR Pituitary Gland OR NT2/D1 OR Other Organ Systems OR Cerebral Ventricles OR Peripheral blood lymphocytes OR DU-145 OR Corpus Callosum OR Large Intestine OR PC-12 cells OR CCRF-CEM OR Vascular smooth muscle cells OR Hepatoma Cell Lines not otherwise specified OR Tissues and Primary Cells not otherwise specified OR BA/F3 OR BDCA-3+ dendritic cells OR M14 OR Other Bone marrow cells OR Granule cells OR COLO205 OR A2780 OR Nucleus Accumbens OR Thymocytes OR Other Monocyte-derived dendritic cells OR Granulocytes not otherwise specified OR Osteoblasts OR NK cells not otherwise specified OR Granulosa cells OR Pyramidal neurons OR LOX IMVI OR MCF7 OR EKVX OR MOLT-4 OR Colon Cancer Cell Lines not otherwise specified OR Melanoma Cell Lines not otherwise specified OR Stem cells not otherwise specified OR Epidermis OR Skeletal Muscle OR U937 OR Immune cell lines not otherwise specified OR Trigeminal Ganglion OR SK-MEL-2 OR UACC-257 OR Cornea OR Other Stem cells OR Dermis OR Splenocytes OR Thyroid Gland OR Liver OR Breast Cancer Cell Lines not otherwise specified OR Substantia Nigra OR Macrophage Cancer Cell Lines not otherwise specified OR MDA-MB-468 OR Eosinophils OR Other T lymphocytes OR Myeloma Cell Lines not otherwise specified OR Nervous System not otherwise specified OR Hep3B OR Other Immune cell lines OR SK-OV-3 OR Myeloid dendritic cells OR PBMCs OR Other B lymphocytes OR 293 cells OR Other Epithelial cells OR Memory T lymphocytes not otherwise specified OR Murine NKT cells OR Vd2 Gamma-delta T cells OR Cell Line not otherwise specified OR Hypothalamus OR Plasmacytoid dendritic cells OR MEF cells OR NCI-H23 OR SK-MEL-5 OR Retina OR Pre-B lymphocytes OR Caco2 cells OR Immune cells not otherwise specified OR Stromal cells OR 786-0 OR HUVEC cells OR Lung OR Embryonic stem cells OR P19 OR Putamen OR Lymph node OR TK-10 OR RPMI-8266 OR BT-474 OR Other Pancreatic Cancer Cell Lines OR Other Prostate Cancer Cell Lines OR MG-63 OR Central memory helper T cells OR HCT-15 OR Effector memory helper T cells OR Sertoli cells OR SK-N-SH OR BDCA-1+ dendritic cells OR RXF-393) AND (mol. types = biologic drug OR canonical pathway OR chemical - endogenous mammalian OR chemical - endogenous non-mammalian OR chemical - kinase inhibitor OR chemical - other OR chemical - protease inhibitor OR chemical drug OR chemical reagent OR chemical toxicant OR complex OR cytokine OR disease OR enzyme OR function OR fusion gene/product OR G-protein coupled receptor OR group OR growth factor OR ion channel OR kinase OR ligand-dependent nuclear receptor OR mature microRNA OR microRNA OR other OR peptidase OR phosphatase OR transcription regulator OR translation regulator OR transmembrane receptor OR transporter) AND

(data sources = An Open Access Database of Genome-wide Association Results OR BIND OR BioGRID OR Catalogue Of Somatic Mutations In Cancer (COSMIC) OR Chemical Carcinogenesis Research Information System (CCRIS) OR ClinicalTrials.gov OR ClinVar OR Cognia OR DIP OR DrugBank OR Gene Ontology (GO) OR GVK Biosciences OR Hazardous Substances Data Bank (HSDB) OR HumanCyc OR Ingenuity Expert Findings OR Ingenuity ExpertAssist Findings OR IntAct OR Interactome studies OR MIPS OR miRBase OR miRecords OR Mouse Genome Database (MGD) OR Obesity Gene Map Database OR Online Mendelian Inheritance in Man (OMIM) OR TarBase OR TargetScan Human)

### Top Canonical Pathways

| Name                                                                              | p-value  | Overlap     |
|-----------------------------------------------------------------------------------|----------|-------------|
| <b>LPS/IL-1 Mediated Inhibition of RXR Function</b>                               | 1.08E-04 | 12.5 % 5/40 |
| <b>Basal Cell Carcinoma Signaling</b>                                             | 5.10E-03 | 22.2 % 2/9  |
| <b>PXR/RXR Activation</b>                                                         | 6.33E-03 | 20.0 % 2/10 |
| <b>Protein Kinase A Signaling</b>                                                 | 1.24E-02 | 5.4 % 4/74  |
| <b>Regulation Of The Epithelial Mesenchymal Transition In Development Pathway</b> | 1.42E-02 | 13.3 % 2/15 |

### Top Upstream Regulators

#### Upstream Regulators

| Name                | p-value  | Predicted Activation |
|---------------------|----------|----------------------|
| <b>NR1I2</b>        | 3.56E-05 |                      |
| <b>alitretinoin</b> | 1.04E-04 |                      |

|                                 |          |
|---------------------------------|----------|
| <b>AKR1B1</b>                   | 1.50E-04 |
| <b>glycerol</b>                 | 4.47E-04 |
| <b>galactosylceramide-alpha</b> | 4.47E-04 |

### Causal Network

| Name                   | p-value  | Predicted Activation |
|------------------------|----------|----------------------|
| <b>St. John's wort</b> | 5.06E-06 |                      |
| <b>paraoxon</b>        | 3.45E-05 |                      |
| <b>thiamine</b>        | 3.45E-05 |                      |
| <b>troleandomycin</b>  | 8.41E-05 |                      |
| <b>mir-210</b>         | 8.41E-05 |                      |

### Top Diseases and Bio Functions

#### Diseases and Disorders

| Name                                       | p-value range       | # Molecules |
|--------------------------------------------|---------------------|-------------|
| <b>Connective Tissue Disorders</b>         | 3.21E-02 - 8.84E-04 | 12          |
| <b>Organismal Injury and Abnormalities</b> | 3.67E-02 - 8.84E-04 | 36          |
| <b>Skeletal and Muscular Disorders</b>     | 3.21E-02 - 8.84E-04 | 13          |
| <b>Gastrointestinal Disease</b>            | 3.67E-02 - 1.46E-03 | 26          |
| <b>Hepatic System Disease</b>              | 3.55E-02 - 1.46E-03 | 9           |

**Molecular and Cellular Functions**

| Name                               | p-value range       | # Molecules |
|------------------------------------|---------------------|-------------|
| <b>Lipid Metabolism</b>            | 3.67E-02 - 2.60E-04 | 11          |
| <b>Small Molecule Biochemistry</b> | 3.67E-02 - 2.60E-04 | 12          |
| <b>Cell Death and Survival</b>     | 3.67E-02 - 8.84E-04 | 7           |
| <b>Molecular Transport</b>         | 3.67E-02 - 1.46E-03 | 13          |
| <b>Carbohydrate Metabolism</b>     | 3.67E-02 - 2.18E-03 | 6           |

**Physiological System Development and Function**

| Name                                                  | p-value range       | # Molecules |
|-------------------------------------------------------|---------------------|-------------|
| <b>Respiratory System Development and Function</b>    | 2.18E-03 - 2.18E-03 | 2           |
| <b>Digestive System Development and Function</b>      | 2.46E-02 - 3.02E-03 | 2           |
| <b>Hepatic System Development and Function</b>        | 2.46E-02 - 3.02E-03 | 2           |
| <b>Organ Development</b>                              | 3.67E-02 - 3.02E-03 | 7           |
| <b>Cardiovascular System Development and Function</b> | 3.67E-02 - 1.24E-02 | 4           |

**Top Tox Functions****Assays: Clinical Chemistry and Hematology**

| Name                                       | p-value range       | # Molecules |
|--------------------------------------------|---------------------|-------------|
| <b>Increased Levels of Red Blood Cells</b> | 1.28E-01 - 1.28E-01 | 1           |

**Increased Levels of Hematocrit**

1.50E-01 - 1.50E-01

1

**Cardiotoxicity**

| Name                            | p-value range       | # Molecules |
|---------------------------------|---------------------|-------------|
| <b>Cardiac Inflammation</b>     | 3.67E-02 - 4.00E-03 | 2           |
| <b>Cardiac Damage</b>           | 1.61E-02 - 1.61E-02 | 2           |
| <b>Cardiac Arrhythmia</b>       | 3.13E-01 - 2.46E-02 | 2           |
| <b>Cardiac Dysfunction</b>      | 4.87E-02 - 4.87E-02 | 1           |
| <b>Congenital Heart Anomaly</b> | 3.71E-01 - 6.05E-02 | 2           |

**Hepatotoxicity**

| Name                                           | p-value range       | # Molecules |
|------------------------------------------------|---------------------|-------------|
| <b>Liver Inflammation/Hepatitis</b>            | 7.21E-02 - 3.02E-03 | 3           |
| <b>Liver Steatosis</b>                         | 1.49E-02 - 3.02E-03 | 4           |
| <b>Liver Hyperplasia/Hyperproliferation</b>    | 4.30E-01 - 1.07E-02 | 20          |
| <b>Hepatocellular Peroxisome Proliferation</b> | 4.87E-02 - 1.24E-02 | 1           |
| <b>Liver Cholestasis</b>                       | 1.91E-01 - 1.24E-02 | 2           |

**Nephrotoxicity**

| Name                  | p-value range       | # Molecules |
|-----------------------|---------------------|-------------|
| <b>Kidney Failure</b> | 3.13E-01 - 1.24E-02 | 2           |

|                           |                     |   |
|---------------------------|---------------------|---|
| <b>Glomerular Injury</b>  | 1.81E-01 - 6.89E-02 | 2 |
| <b>Renal Inflammation</b> | 1.81E-01 - 6.89E-02 | 2 |
| <b>Renal Nephritis</b>    | 1.81E-01 - 6.89E-02 | 2 |
| <b>Renal Damage</b>       | 1.91E-01 - 1.50E-01 | 2 |

**Top Regulator Effect Networks**

**Top Networks**

| ID       | Associated Network Functions                                                  | Score |
|----------|-------------------------------------------------------------------------------|-------|
| <b>1</b> | Lipid Metabolism, Small Molecule Biochemistry, Cancer                         | 45    |
| <b>2</b> | Cancer, Gastrointestinal Disease, Hepatic System Disease                      | 24    |
| <b>3</b> | Lipid Metabolism, Molecular Transport, Small Molecule Biochemistry            | 19    |
| <b>4</b> | Cellular Compromise, Cell Morphology, Nervous System Development and Function | 3     |

**Top Tox Lists**



| Name                                                                | p-value  | Overlap     |
|---------------------------------------------------------------------|----------|-------------|
| <b>LPS/IL-1 Mediated Inhibition of RXR Function</b>                 | 1.21E-04 | 12.2 % 5/41 |
| <b>PXR/RXR Activation</b>                                           | 6.33E-03 | 20.0 % 2/10 |
| <b>Cytochrome P450 Panel - Substrate is a Xenobiotic (Rat)</b>      | 2.46E-02 | 50.0 % 1/2  |
| <b>Genes Upregulated in Response to Chronic Renal Failure (Rat)</b> | 2.46E-02 | 50.0 % 1/2  |
| <b>Glutathione Depletion - Hepatocellular Hypertrophy</b>           | 3.67E-02 | 33.3 % 1/3  |

### Top My Lists

### Top My Pathways

### Top Analysis-Ready Molecules

### Expr Fold Change

| Molecules     | Expr. Value | Chart |
|---------------|-------------|-------|
| <b>DST</b>    | ↑ 2.892     |       |
| <b>PGP</b>    | ↑ 1.867     |       |
| <b>TUBA1A</b> | ↑ 1.823     |       |
| <b>ABCC3</b>  | ↑ 1.772     |       |

|       |         |
|-------|---------|
| U2AF2 | ↑ 1.568 |
| MCM7  | ↑ 1.547 |
| SBNO1 | ↑ 1.545 |
| KLHL8 | ↑ 1.541 |

**Expr Fold Change**

| Molecules | Expr. Value | Chart |
|-----------|-------------|-------|
| GBA       | ↓ -4.726    |       |
| HPGDS*    | ↓ -3.187    |       |
| RASGRP3   | ↓ -3.119    |       |
| SLCO4A1   | ↓ -2.357    |       |
| PGPEP1    | ↓ -2.338    |       |
| PDE8A     | ↓ -2.180    |       |
| FHL2      | ↓ -2.167    |       |
| VPS28     | ↓ -2.147    |       |
| SUGT1     | ↓ -2.089    |       |
| SLC11A2   | ↓ -2.077    |       |
